# Supplementary material
Source: ML conference proceedings conference paper supplement (https://proceedings.neurips.cc/paper_files/paper/2019/hash/8efb100a295c0c690931222ff4467bb8-Abstract.html)
Supplement: Supplementary file [file 8efb100a295c0c690931222ff4467bb8-Supplemental.zip]

---

# Supplementary for Selecting Optimal Decisions via Distributionally Robust Nearest-Neighbor Regression

---

**Ruidi Chen**

Division of Systems Engineering  
Boston University  
Boston, MA 02215  
rchen15@bu.edu

**Ioannis Ch. Paschalidis \***

Department of Electrical and Computer Engineering  
Division of Systems Engineering  
and Department of Biomedical Engineering  
Boston University  
Boston, MA 02215  
yannisp@bu.edu

## A Key Concepts

### A.1 Sub-Gaussian Random Variables

**Definition 1** (Sub-Gaussian random variable/vector). A random variable  $y \in \mathbb{R}$  with mean  $\mu_y \triangleq \mathbb{E}(y)$  is sub-Gaussian if there exists some positive constant  $C$  such that the tail of  $y$  satisfies:

$$\mathbb{P}(|y - \mu_y| \geq t) \leq 2 \exp(-t^2/(2C^2)), \forall t \geq 0. \quad (1)$$

The smallest constant  $\sqrt{2}C$  satisfying (1) is called the sub-Gaussian norm, or the  $\psi_2$ -norm of  $y$ , denoted as  $\|y\|_{\psi_2}$ . All sub-Gaussian random variables have a finite  $\psi_2$ -norm. A random vector  $\mathbf{z} \in \mathbb{R}^p$  is sub-Gaussian if  $\mathbf{z}'\mathbf{u}$  is sub-Gaussian for any  $\mathbf{u} \in \mathbb{R}^p$ . The  $\psi_2$ -norm of a vector  $\mathbf{z}$  is defined as:

$$\|\mathbf{z}\|_{\psi_2} \triangleq \sup_{\mathbf{u} \in \mathbb{S}^p} \|\mathbf{z}'\mathbf{u}\|_{\psi_2},$$

where  $\mathbb{S}^p$  denotes the unit sphere in the  $p$ -dimensional Euclidean space.

The sub-Gaussian property (1) describes a class of distributions whose tail decays at least as fast as a Gaussian; some classical examples include the Gaussian, Bernoulli, and any bounded distribution. An equivalent property to (1) says the following:

$$\mathbb{E}[\exp(\lambda y)] \leq \exp\left(\frac{\lambda^2 C^2}{2} + \lambda \mu_y\right), \quad \forall \lambda \in \mathbb{R}.$$

The  $\psi_2$ -norm of a sub-Gaussian random variable is usually related to its standard deviation, and thus characterizes the random fluctuation embedded in the variable. For example, for a Gaussian random variable  $y \sim \mathcal{N}(\mu_y, \sigma^2)$ , its *Moment Generating Function (MGF)* is  $M(\lambda) \triangleq \mathbb{E}[\exp(\lambda y)] = \exp(\lambda^2 \sigma^2 / 2 + \lambda \mu_y)$ , which implies that its  $\psi_2$ -norm is just a multiple of  $\sigma$ .

### A.2 Gaussian width

**Definition 2** (Gaussian width). For any set  $\mathcal{A} \subseteq \mathbb{R}^m$ , its Gaussian width is defined as:

$$w(\mathcal{A}) \triangleq \mathbb{E}\left[\sup_{\mathbf{u} \in \mathcal{A}} \mathbf{u}'\mathbf{g}\right],$$

where  $\mathbf{g} \sim \mathcal{N}(\mathbf{0}, \mathbf{I})$  is an  $m$ -dimensional standard Gaussian random vector.

---

\*<http://sites.bu.edu/paschalidis>

## B Omitted Theorems and Proofs

### B.1 Bounding the Estimation Bias

To bound  $\|\beta_m^* - \hat{\beta}_m\|_2$ , we present a simplified version of Theorem 3.11 in [1] as follows.

**Theorem B.1.** *Under Assumptions A, B, C, D, E, when the sample size  $N_m \geq n_m$ , with probability at least  $\delta_m$ ,*

$$\|\beta_m^* - \hat{\beta}_m\|_2 \leq \tau_m.$$

The parameters  $n_m, \delta_m, \tau_m$  are related to the Gaussian width of the unit ball in  $\|\cdot\|_\infty$ , the sub-Gaussian norm of  $(\mathbf{x}_m, y_m)$ , the eigenvalues of the covariance matrix of  $(\mathbf{x}_m, y_m)$ , as well as the geometric structure of the true regression coefficient  $\beta_m^*$ . Moreover,  $\tau_m$  is decreased as the sample size increases and the uncertainty embedded in  $(\mathbf{x}_m, y_m)$  is reduced.

### B.2 Bounding the Distance to the Nearest Neighbors

We will show that the distances between  $\mathbf{x}$  and its  $K_m$  nearest neighbors could be upper bounded probabilistically. All predictors are assumed to be centered, and independent from each other. In Theorem B.2 we present a lower bound for  $\mathbb{P}(\|\mathbf{x} - \mathbf{x}_{m(i)}\|_{\mathbf{W}} \leq \bar{w}_m, i = 1, \dots, K_m)$ , for any positive definite diagonal matrix  $\mathbf{W}$ .

**Theorem B.2.** *Suppose we are given  $N_m$  i.i.d. samples  $(\mathbf{x}_{mi}, y_{mi})$ ,  $i \in [N_m]$ , drawn from some unknown probability distribution with finite fourth moment. Every  $\mathbf{x}_{mi}$  has independent, centered coordinates:*

$$\mathbb{E}(\mathbf{x}_{mi}) = \mathbf{0}, \text{ cov}(\mathbf{x}_{mi}) = \text{diag}(\sigma_{m1}^2, \dots, \sigma_{mp}^2), \forall i \in [N_m].$$

*For a fixed predictor  $\mathbf{x}$ , and any given positive definite diagonal matrix  $\mathbf{W} \in \mathbb{R}^{p \times p}$  with diagonal elements  $w_j$ ,  $j \in [p]$ , and  $|w_j| \leq \bar{B}^2$ , suppose:*

$$|(x_{mij} - x_j)^2 - (\sigma_{mj}^2 + x_j^2)| \leq T_m, \text{ a.s., } \forall i \in [N_m], j \in [p],$$

*where  $x_{mij}, x_j$  are the  $j$ -th components of  $\mathbf{x}_{mi}$  and  $\mathbf{x}$ , respectively. Under the condition that  $\bar{w}_m^2 > \bar{B}^2 \sum_{j=1}^p (\sigma_{mj}^2 + x_j^2)$ , with probability at least  $1 - I_{1-p_{m0}}(N_m - K_m + 1, K_m)$ ,*

$$\|\mathbf{x} - \mathbf{x}_{m(i)}\|_{\mathbf{W}} \leq \bar{w}_m, i \in [K_m],$$

*where*

$$I_{1-p_{m0}}(N_m - K_m + 1, K_m) \triangleq \frac{N_m!}{(K_m - 1)!(N_m - K_m)!} \int_0^{1-p_{m0}} t^{N_m - K_m} (1 - t)^{K_m - 1} dt,$$

$$p_{m0} = 1 - \exp\left(-\frac{\sigma_m^2}{T_m^2} g\left(\frac{T_m(\bar{w}_m^2/\bar{B}^2 - \sum_j (\sigma_{mj}^2 + x_j^2))}{\sigma_m^2}\right)\right),$$

*and*

$$\sigma_m = \sqrt{\sum_{j=1}^p \text{var}((x_{mij} - x_j)^2)}, \quad g(u) = (1 + u) \log(1 + u) - u.$$

*Proof.* To simplify the notation, we will omit the subscript  $m$  in all proofs, e.g., using  $\mathbf{x}_i$  and  $\mathbf{x}_{(i)}$  for  $\mathbf{x}_{mi}$  and  $\mathbf{x}_{m(i)}$ , respectively, and  $N$  for  $N_m$ . Define the event  $\mathcal{A}_i := \{\|\mathbf{x}_i - \mathbf{x}\|_{\bar{B}^2 \mathbf{I}} \leq \bar{w}\}$ . As long as we can calculate the probability that at least  $K$  of  $\mathcal{A}_i$ ,  $i \in [N]$ , occur, we are able to provide a lower bound on  $\mathbb{P}(\|\mathbf{x} - \mathbf{x}_{(i)}\|_{\mathbf{W}} \leq \bar{w}, i \in [K])$ . Note that given  $\mathbf{x}$ ,  $\mathcal{A}_i$ ,  $i \in [N]$ , are independent

and equiprobable, since  $\mathbf{x}_i, i \in [N]$ , are i.i.d. Based on Bennett's inequality [5], we have:

$$\begin{aligned}
\mathbb{P}(\mathcal{A}_i) &= \mathbb{P}(\|\mathbf{x}_i - \mathbf{x}\|_{\bar{B}^2 \mathbf{I}}^2 \leq \bar{w}^2) \\
&= \mathbb{P}\left(\bar{B}^2(x_{i1} - x_1)^2 + \dots + \bar{B}^2(x_{ip} - x_p)^2 \leq \bar{w}^2\right) \\
&= \mathbb{P}(t_1 + \dots + t_p \leq \bar{w}^2 / \bar{B}^2) \\
&= \mathbb{P}\left(\sum_j (t_j - (\sigma_j^2 + x_j^2)) \leq \bar{w}^2 / \bar{B}^2 - \sum_j (\sigma_j^2 + x_j^2)\right) \\
&\geq 1 - \exp\left(-\frac{\sigma^2}{T^2} g\left(\frac{T(\bar{w}^2 / \bar{B}^2 - \sum_j (\sigma_j^2 + x_j^2))}{\sigma^2}\right)\right) \\
&\triangleq p_0,
\end{aligned}$$

where  $t_j = (x_{ij} - x_j)^2, j \in [p]; \sigma^2 = \sum_j \text{var}(t_j)$ . In the above derivation, we used the fact that  $t_j, j \in [p]$ , are independent, and  $|t_j - \mathbb{E}[t_j]| \leq T$ , a.s.,  $\forall j$ .

Given the lower bound for  $\mathbb{P}(\mathcal{A}_i)$ , we can derive a lower bound for the probability that exactly  $K$  of  $\mathcal{A}_i, i \in [N]$ , occur. For a given  $\mathbf{x}, \mathcal{A}_i, i \in [N]$ , are independent, and thus,

$$\begin{aligned}
\mathbb{P}(\|\mathbf{x} - \mathbf{x}_{(i)}\|_{\mathbf{W}} \leq \bar{w}, i \in [K]) &\geq \mathbb{P}(\text{at least } K \text{ of } \mathcal{A}_i, i \in [N] \text{ occur}) \\
&= \sum_{k=K}^N \binom{N}{k} (\mathbb{P}(\mathcal{A}_i))^k (1 - \mathbb{P}(\mathcal{A}_i))^{N-k} \\
&\geq \sum_{k=K}^N \binom{N}{k} p_0^k (1 - p_0)^{N-k} \\
&= 1 - I_{1-p_0}(N - K + 1, K),
\end{aligned}$$

where  $I_{1-p_0}(N - K + 1, K)$  is the *regularized incomplete beta function* defined as  $I_{1-p_0}(N - K + 1, K) \triangleq (N - K + 1) \binom{N}{K-1} \int_0^{1-p_0} t^{N-K} (1-t)^{K-1} dt$ . The bound above used the monotonicity of the binomial tail distribution in the “success” probability.  $\square$

### B.3 Proof of Theorem 2.1

*Proof.* We omit the subscript  $m$  for simplicity. By Theorems B.1 and B.2, we have

$$\begin{aligned}
|(\mathbf{x} - \mathbf{x}_{(i)})'(\boldsymbol{\beta}^* - \hat{\boldsymbol{\beta}})| &= |(\mathbf{x} - \mathbf{x}_{(i)})' \hat{\mathbf{W}}^{\frac{1}{2}} \hat{\mathbf{W}}^{-\frac{1}{2}} (\boldsymbol{\beta}^* - \hat{\boldsymbol{\beta}})| \\
&\leq \|(\mathbf{x} - \mathbf{x}_{(i)})' \hat{\mathbf{W}}^{\frac{1}{2}}\|_2 \|\hat{\mathbf{W}}^{-\frac{1}{2}} (\boldsymbol{\beta}^* - \hat{\boldsymbol{\beta}})\|_2 \\
&\leq \frac{\bar{w}\tau}{b},
\end{aligned}$$

where the second inequality used the fact that  $\|\hat{\mathbf{W}}^{-\frac{1}{2}} (\boldsymbol{\beta}^* - \hat{\boldsymbol{\beta}})\|_2 \leq \frac{\tau}{b}$  if  $\|\boldsymbol{\beta}^* - \hat{\boldsymbol{\beta}}\|_2 \leq \tau$ , which can be verified by the Courant-Fischer Theorem, and the fact that  $\hat{\mathbf{W}}$  is diagonal with elements  $\hat{\beta}_1^2, \dots, \hat{\beta}_p^2$ , and  $|\hat{\beta}_j| \geq b$ . Based on the inequality  $\left(\sum_{i=1}^n a_i\right)^2 \leq n \left(\sum_{i=1}^n a_i^2\right)$ , we know:

$$\begin{aligned}
|(\mathbf{x} - \mathbf{x}_{(i)})' \hat{\boldsymbol{\beta}}| &= \left| \sum_{j=1}^p \hat{\beta}_j (\mathbf{x} - \mathbf{x}_{(i)})_j \right| \\
&\leq \sqrt{p \sum_{j=1}^p \left(\hat{\beta}_j (\mathbf{x} - \mathbf{x}_{(i)})_j\right)^2} \\
&= \sqrt{p(\mathbf{x} - \mathbf{x}_{(i)})' \hat{\mathbf{W}} (\mathbf{x} - \mathbf{x}_{(i)})} \\
&\leq \sqrt{p\bar{w}}.
\end{aligned}$$

Therefore,

$$\begin{aligned}
|(\mathbf{x} - \mathbf{x}_{(i)})' \boldsymbol{\beta}^*| &= |(\mathbf{x} - \mathbf{x}_{(i)})'(\boldsymbol{\beta}^* - \hat{\boldsymbol{\beta}}) + (\mathbf{x} - \mathbf{x}_{(i)})' \hat{\boldsymbol{\beta}}| \\
&\leq |(\mathbf{x} - \mathbf{x}_{(i)})'(\boldsymbol{\beta}^* - \hat{\boldsymbol{\beta}})| + |(\mathbf{x} - \mathbf{x}_{(i)})' \hat{\boldsymbol{\beta}}| \\
&\leq \frac{\bar{w}\tau}{b} + \sqrt{p}\bar{w}.
\end{aligned}$$

Thus, for a given  $\mathbf{x}$ ,

$$\begin{aligned}
&\mathbb{E}[(\hat{y}(\mathbf{x}) - y(\mathbf{x}))^2 | \mathbf{x}, \mathbf{x}_i] \\
&= \left( \frac{1}{K} \sum_{i=1}^K ((\mathbf{x} - \mathbf{x}_{(i)})' \boldsymbol{\beta}^* + h(\mathbf{x}) - h(\mathbf{x}_{(i)})) \right)^2 + \frac{\eta^2}{K} + \eta^2 \\
&\leq \left( \frac{1}{K} \sum_{i=1}^K (|(\mathbf{x} - \mathbf{x}_{(i)})' \boldsymbol{\beta}^*| + |h(\mathbf{x}) - h(\mathbf{x}_{(i)})|) \right)^2 + \frac{\eta^2}{K} + \eta^2 \\
&\leq \left( \frac{\bar{w}\tau}{b} + \sqrt{p}\bar{w} + \frac{L\bar{w}}{B} \right)^2 + \frac{\eta^2}{K} + \eta^2
\end{aligned} \tag{2}$$

The above bound used both Thms. B.1 and B.2, whose statements hold with probabilities no less than  $\delta$  and  $1 - I_{1-p_0}(N - K + 1, K)$  w.r.t. sampling, respectively. Let  $\mathcal{A}$  and  $\mathcal{B}$  the events corresponding to the statements of Thms. B.1 and B.2 being satisfied. Using bar to denote complement, and the union bound, it follows that (2) holds with probability

$$\mathbb{P}(\mathcal{A} \cap \mathcal{B}) = 1 - \mathbb{P}(\bar{\mathcal{A}} \cap \bar{\mathcal{B}}) = 1 - \mathbb{P}(\bar{\mathcal{A}} \cup \bar{\mathcal{B}}) \geq \delta - I_{1-p_0}(N - K + 1, K).$$

The probability bound can be easily derived using Markov's inequality.  $\square$

#### B.4 Proof of Theorem 3.1

*Proof.* The proof borrows ideas from Theorem 1.5 in [2]. Define  $W_m \triangleq e^{-\xi \hat{y}_m(\mathbf{x})} / \sum_{j=1}^M e^{-\xi \hat{y}_j(\mathbf{x})}$ , and  $\phi \triangleq \sum_{m=1}^M e^{-\xi \hat{y}_m(\mathbf{x})} e^{-\xi y_m(\mathbf{x})}$ . Then,

$$\begin{aligned}
\phi &= \left( \sum_{j=1}^M e^{-\xi \hat{y}_j(\mathbf{x})} \right) \sum_{m=1}^M W_m e^{-\xi y_m(\mathbf{x})} \\
&\leq \left( \sum_{j=1}^M e^{-\xi \hat{y}_j(\mathbf{x})} \right) \sum_{m=1}^M W_m (1 - \xi y_m(\mathbf{x}) + \xi^2 y_m^2(\mathbf{x})) \\
&= \left( \sum_{j=1}^M e^{-\xi \hat{y}_j(\mathbf{x})} \right) \left( 1 - \xi \sum_{m=1}^M W_m y_m(\mathbf{x}) + \xi^2 \sum_{m=1}^M W_m y_m^2(\mathbf{x}) \right) \\
&\leq \left( \sum_{j=1}^M e^{-\xi \hat{y}_j(\mathbf{x})} \right) e^{-\xi \sum_{m=1}^M W_m y_m(\mathbf{x}) + \xi^2 \sum_{m=1}^M W_m y_m^2(\mathbf{x})},
\end{aligned}$$

where the first inequality uses the fact that for  $x \geq 0$ ,  $e^{-x} \leq 1 - x + x^2$ , and the last inequality is due to the fact that  $1 + x \leq e^x$ . Next let us examine the sum of exponentials:

$$\begin{aligned}
\sum_{j=1}^M e^{-\xi \hat{y}_j(\mathbf{x})} &\leq \sum_{j=1}^M \left( 1 - \xi \hat{y}_j(\mathbf{x}) + \xi^2 \hat{y}_j^2(\mathbf{x}) \right) \\
&= M \left( 1 - \xi \frac{1}{M} \sum_{j=1}^M \hat{y}_j(\mathbf{x}) + \xi^2 \frac{1}{M} \sum_{j=1}^M \hat{y}_j^2(\mathbf{x}) \right) \\
&\leq M e^{-\xi \frac{1}{M} \sum_{j=1}^M \hat{y}_j(\mathbf{x}) + \xi^2 \frac{1}{M} \sum_{j=1}^M \hat{y}_j^2(\mathbf{x})}.
\end{aligned}$$

Using the two bounds above, for any  $k \in [M]$ , we have

$$\begin{aligned}
e^{-\xi \hat{y}_k(\mathbf{x}) - \xi y_k(\mathbf{x})} &\leq \phi \\
&\leq M e^{-\frac{\xi \sum_{j=1}^M \hat{y}_j(\mathbf{x})}{M} + \frac{\xi^2 \sum_{j=1}^M \hat{y}_j^2(\mathbf{x})}{M} - \xi \sum_{m=1}^M W_m y_m(\mathbf{x}) + \xi^2 \sum_{m=1}^M W_m y_m^2(\mathbf{x})}.
\end{aligned} \tag{3}$$

Taking the logarithm on both sides of (3) and dividing by  $\xi$ , we obtain

$$\begin{aligned} \frac{1}{M} \sum_{m=1}^M \hat{y}_m(\mathbf{x}) + \sum_{m=1}^M \frac{e^{-\xi \hat{y}_m(\mathbf{x})}}{\sum_j e^{-\xi \hat{y}_j(\mathbf{x})}} y_m(\mathbf{x}) &\leq \hat{y}_k(\mathbf{x}) + y_k(\mathbf{x}) \\ + \xi \left( \frac{1}{M} \sum_{m=1}^M \hat{y}_m^2(\mathbf{x}) + \sum_{m=1}^M \frac{e^{-\xi \hat{y}_m(\mathbf{x})}}{\sum_j e^{-\xi \hat{y}_j(\mathbf{x})}} y_m^2(\mathbf{x}) \right) &+ \frac{\log M}{\xi}. \end{aligned}$$

□

### B.5 Proof of Theorem 3.2

*Proof.* By the sub-Gaussian assumption we have:

$$\begin{aligned} \mathbb{P} \left( \sum_k \frac{e^{-\xi \hat{y}_k(\mathbf{x})}}{\sum_j e^{-\xi \hat{y}_j(\mathbf{x})}} \hat{y}_k(\mathbf{x}) > x_{\text{co}} - T(\mathbf{x}) \right) &\leq \mathbb{P} \left( \max_k \hat{y}_k(\mathbf{x}) > x_{\text{co}} - T(\mathbf{x}) \right) \\ &= \mathbb{P} \left( \bigcup_k \{ \hat{y}_k(\mathbf{x}) > x_{\text{co}} - T(\mathbf{x}) \} \right) \\ &\leq \sum_k \mathbb{P}(\hat{y}_k(\mathbf{x}) > x_{\text{co}} - T(\mathbf{x})) \\ &\leq \sum_k \exp \left( - \frac{(x_{\text{co}} - T(\mathbf{x}) - \mu_{\hat{y}_k}(\mathbf{x}))^2}{2C_k^2(\mathbf{x})} \right). \end{aligned} \tag{4}$$

Note that the probability in (4) is taken with respect to the measure of the training samples. We essentially want to find the largest threshold  $T(\mathbf{x})$  such that the probability of the expected improvement being less than  $T(\mathbf{x})$  is small. Given a small  $0 < \bar{\epsilon} < 1$  and due to (4), to satisfy

$$\mathbb{P} \left( \sum_k \frac{e^{-\xi \hat{y}_k(\mathbf{x})}}{\sum_j e^{-\xi \hat{y}_j(\mathbf{x})}} \hat{y}_k(\mathbf{x}) > x_{\text{co}} - T(\mathbf{x}) \right) \leq \bar{\epsilon},$$

it suffices to set:

$$\sum_k \exp \left( - \frac{(x_{\text{co}} - T(\mathbf{x}) - \mu_{\hat{y}_k}(\mathbf{x}))^2}{2C_k^2(\mathbf{x})} \right) \leq \bar{\epsilon}. \tag{5}$$

A sufficient condition for (5) is:

$$\exp \left( - \frac{(x_{\text{co}} - T(\mathbf{x}) - \mu_{\hat{y}_m}(\mathbf{x}))^2}{2C_m^2(\mathbf{x})} \right) \leq \frac{\bar{\epsilon}}{M}, \quad \forall m \in [M],$$

which yields that,

$$T(\mathbf{x}) \leq x_{\text{co}} - \mu_{\hat{y}_m}(\mathbf{x}) - \sqrt{-2C_m^2(\mathbf{x}) \log(\bar{\epsilon}/M)}, \quad \forall m \in [M]. \tag{6}$$

Given that  $T(\mathbf{x})$  is non-negative, we set the largest possible threshold satisfying (6) to:

$$T(\mathbf{x}) = \max \left( 0, \min_m \left( x_{\text{co}} - \mu_{\hat{y}_m}(\mathbf{x}) - \sqrt{-2C_m^2(\mathbf{x}) \log(\bar{\epsilon}/M)} \right) \right).$$

When using a deterministic policy ( $\xi \rightarrow \infty$ ), for any  $m \in [M]$ , we have

$$\begin{aligned} \mathbb{P}(\min_m \hat{y}_m(\mathbf{x}) > x_{\text{co}} - T(\mathbf{x})) &= \mathbb{P} \left( \bigcap_m \{ \hat{y}_m(\mathbf{x}) > x_{\text{co}} - T(\mathbf{x}) \} \right) \\ &\leq \mathbb{P}(\hat{y}_m(\mathbf{x}) > x_{\text{co}} - T(\mathbf{x})) \\ &\leq \exp \left( - \frac{(x_{\text{co}} - T(\mathbf{x}) - \mu_{\hat{y}_m}(\mathbf{x}))^2}{2C_m^2(\mathbf{x})} \right). \end{aligned}$$

Similarly, to make

$$\mathbb{P}(\min_m \hat{y}_m(\mathbf{x}) > x_{\text{co}} - T(\mathbf{x})) \leq \bar{\epsilon},$$

we set:

$$T(\mathbf{x}) = \max \left( 0, \min_m \left( x_{\text{co}} - \mu_{\hat{y}_m}(\mathbf{x}) - \sqrt{-2C_m^2(\mathbf{x}) \log \bar{\epsilon}} \right) \right),$$

which establishes the desired result. □

## C Numerical Experiments Details

### C.1 Cohort Selection

The patients that meet the following criteria are included in the hypertension dataset:

- Patients present in the system for at least 1 year;
- Received at least one type of cardiovascular medications, including ACE inhibitors, Angiotensin Receptor Blockers (ARB), calcium channel blockers, diuretics,  $\alpha$ -blockers and  $\beta$ -blockers, and had at least one medical record 10 days before this prescription.
- Had at least one recorded diagnosis of hypertension (corresponding to the ICD-9 diagnosis codes 401-405);
- Had at least three measurements of the systolic blood pressure.

### C.2 Predictive Performance of Various Models

We use four metrics to evaluate the predictive power of various models on the test set:

- The R-square:

$$R^2(\mathbf{y}, \hat{\mathbf{y}}) = 1 - \frac{\sum_{i=1}^{N_t} (y_i - \hat{y}_i)^2}{\sum_{i=1}^{N_t} (y_i - \bar{y})^2},$$

where  $\mathbf{y} = (y_1, \dots, y_{N_t})$  and  $\hat{\mathbf{y}} = (\hat{y}_1, \dots, \hat{y}_{N_t})$  are the vectors of the true (observed) and predicted outcomes, respectively, with  $N_t$  the size of the test set, and  $\bar{y} = (1/N_t) \sum_{i=1}^{N_t} y_i$ .

- The *Mean Squared Error (MSE)*:

$$\text{MSE}(\mathbf{y}, \hat{\mathbf{y}}) = \frac{1}{N_t} \sum_{i=1}^{N_t} (y_i - \hat{y}_i)^2.$$

- The *Mean Absolute Error (MeanAE)* that is more robust to large deviations than the MSE since the absolute value function increases more slowly than the square function over large (absolute) values of the argument.

$$\text{MeanAE}(\mathbf{y}, \hat{\mathbf{y}}) = \frac{1}{N_t} \sum_{i=1}^{N_t} |y_i - \hat{y}_i|.$$

- The MedianAE which can be viewed as a robust measure of the MeanAE, computing the median of the absolute deviations:

$$\text{MedianAE}(\mathbf{y}, \hat{\mathbf{y}}) = \text{Median}(|y_i - \hat{y}_i|, i = 1, \dots, N_t).$$

The out-of-sample performance metrics of the various models on the hypertension dataset are shown in Table 1, where the numbers in the parentheses show the improvement of DRLR informed K-NN compared against other methods. Huber refers to the robust regression method proposed in [3, 4], and CART refers to the *Classification And Regression Trees*. Huber/OLS/LASSO + K-NN means fitting a K-NN regression model with a Huber/OLS/LASSO-weighted distance metric. We note that in order to produce well-defined and meaningful predictive performance metrics, the dataset used to generate Table 1 did not group the patients by their prescriptions. A universal model was fit to all patients using the prescription as one of the predictors. Nevertheless, it would still be considered as a fair comparison as all models were evaluated on the same dataset. The results provide supporting evidence for the validity of our DRLR+K-NN model that outperforms all others in all metrics, and is thus used for predicting the outcomes of counterfactual treatments.

## References

- [1] Ruidi Chen and Ioannis Ch Paschalidis. A robust learning approach for regression models based on distributionally robust optimization. *Journal of Machine Learning Research*, 19(13), 2018.

Table 1: Performance of different models for predicting future systolic blood pressure for hypertension patients.

| Methods    | $R^2$      | MSE          | MeanAE      | MedianAE   |
|------------|------------|--------------|-------------|------------|
| OLS        | 0.31 (14%) | 170.80 (6%)  | 10.09 (7%)  | 8.15 (9%)  |
| LASSO      | 0.31 (14%) | 170.83 (6%)  | 10.08 (7%)  | 8.22 (10%) |
| Huber      | 0.22 (62%) | 193.54 (17%) | 10.70 (12%) | 8.61 (14%) |
| RLAD       | 0.30 (18%) | 173.32 (8%)  | 10.11 (7%)  | 8.28 (11%) |
| K-NN       | 0.33 (10%) | 167.41 (5%)  | 9.62 (2%)   | 7.50 (2%)  |
| OLS+K-NN   | 0.35 (1%)  | 160.22 (0%)  | 9.42 (0%)   | 7.49 (1%)  |
| LASSO+K-NN | 0.32 (12%) | 169.50 (6%)  | 9.74 (3%)   | 7.73 (5%)  |
| Huber+K-NN | 0.32 (10%) | 167.92 (5%)  | 9.71 (3%)   | 7.84 (6%)  |
| DRLR+K-NN  | 0.36 (N/A) | 159.74 (N/A) | 9.42 (N/A)  | 7.38 (N/A) |
| CART       | 0.25 (43%) | 186.23 (14%) | 10.34 (9%)  | 8.22 (10%) |

Table 2: Feature importance from the DRLR model for the hypertension dataset.

| Features                                                        | Regression coefficients |
|-----------------------------------------------------------------|-------------------------|
| measurement: systolic blood pressure                            | 7.62                    |
| age                                                             | 1.87                    |
| lab test: sodium                                                | 1.29                    |
| lab test: hemoglobin                                            | 1.26                    |
| prescription: calcium channel blockers                          | 0.98                    |
| lab test: blood glucose                                         | 0.93                    |
| lab test: hematocrit                                            | -0.82                   |
| sex: female                                                     | 0.76                    |
| lab:mean corpuscular volume                                     | -0.61                   |
| diagnosis: asthma                                               | -0.61                   |
| prescription: ARB                                               | 0.57                    |
| diagnosis: cataract                                             | 0.57                    |
| diagnosis: chronic ischemic heart disease                       | -0.56                   |
| lab test: potassium                                             | 0.55                    |
| diagnosis: heart failure                                        | -0.53                   |
| prescription: diuretics                                         | 0.53                    |
| diagnosis: cardiac dysrhythmias                                 | -0.51                   |
| diagnosis obesity                                               | 0.46                    |
| race: Caucasian                                                 | -0.46                   |
| diagnosis: disorders of fluid electrolyte and acid-base balance | 0.45                    |

- [2] Elad Hazan. Introduction to online convex optimization. *Foundations and Trends® in Optimization*, 2(3-4):157–325, 2016.
- [3] Peter J Huber. Robust estimation of a location parameter. *The Annals of Mathematical Statistics*, pages 73–101, 1964.
- [4] Peter J Huber. Robust regression: asymptotics, conjectures and monte carlo. *The Annals of Statistics*, pages 799–821, 1973.
- [5] Roman Vershynin. *High-dimensional probability: An introduction with applications in data science*. Cambridge University Press (to appear), 2017.
